# Supplementary material for: Bacterial exonuclease III expands its enzymatic activities on single-stranded DNA
Source: eLife journal article supplement (doi:10.7554/elife.95648), 2024-03-13
Supplement: fig6-data1 [file elife-95648-fig6-data1-v1.zip]

1. 100% 2. 100% 3. 100% 4. 100% 5. 100% 6. 100% 7. 100%

100% 100% 100% 100% 100% 100%
