# Supplementary material for: Bacterial exonuclease III expands its enzymatic activities on single-stranded DNA
Source: eLife journal article supplement (doi:10.7554/elife.95648), 2024-03-13
Supplement: fig6-figsupp3-data1 [file elife-95648-fig6-figsupp3-data1-v1.zip]

U E E E E E E E

— — — — —
