# Supplementary material for: Bacterial exonuclease III expands its enzymatic activities on single-stranded DNA
Source: eLife journal article supplement (doi:10.7554/elife.95648), 2024-03-13
Supplement: fig8-figsupp1-data1 [file elife-95648-fig8-figsupp1-data1-v1.zip]

100 100 100 100 100 100 100 100 100 100

100 100 100 100 100
