# Supplementary material for: Bacterial exonuclease III expands its enzymatic activities on single-stranded DNA
Source: eLife. 2024 Jul 3;13:RP95648. doi: 10.7554/eLife.95648 (PMC11221836; doi:10.7554/eLife.95648)
Supplement: Supplementary file 1. [file elife-95648-supp1.xlsx]

## Sheet: ExoIII
Probe 1 treated with ExolII （Mass peak list sorted by intensity)
Mass (Da)	Intensity	%Relative	%Total	Presumed molecular	Theoretical Mass of the ssDNA
2914.9	6310000	100	39.62	FITC-CAAACCCA (-H)	2915.6
2601.5	4760000	75.37	29.86	FITC-CAAACCC (-H)	2602.4
4047.7	1100000	17.43	6.9	undefined
2312.2	1070000	17.01	6.74	FITC-CAAACC (-H)	2313.2
5395.5	618000	9.79	3.88	FITC-CAAACCCAGAGCCAAT (-H)	5396.2
13217.2	418000	6.63	2.63	undefined
643.8	403000	6.39	2.53	undefined
18208.5	198000	3.13	1.24	undefined
4618.5	178000	2.81	1.11	AAACCCAGAGCCAAT	4619
2623.5	114000	1.8	0.71	FITC-CAAACCC (+Na-2H)	2602.4
2023.2	99400	1.58	0.62	undefined
957.6	97000	1.54	0.61	AAA	957.6
4372.7	94400	1.5	0.59	undefined
3081.4	85900	1.36	0.54	AACCCAGAGC (-5H)	3086
976.9	84900	1.35	0.53	AGA (+2H)	973.6
18026.6	84000	1.33	0.53	undefined
3855.3	81000	1.28	0.51	undefined
3327.8	69200	1.1	0.43	CCAATCTTATC (-3H)	3331.2
4213.8	63500	1.01	0.4	undefined
Probe 1 without ExolII
Mass (Da)	Intensity	%Relative	%Total	Presumed molecular	Theoretical Mass of the ssDNA
7501.1	47900000	100	57.31	FITC-CAAACCCAGAGCCAATCTTATCT (-3H)	7504.6
7523.4	47900000	35.28	20.22	FITC-CAAACCCAGAGCCAATCTTATCT (+Na-4H)	7504.6
7546.1	47900000	21.4	12.26	FITC-CAAACCCAGAGCCAATCTTATCT (+2Na-5H)	7504.6
7567.9	47900000	7.2	4.13	FITC-CAAACCCAGAGCCAATCTTATCT (+3Na-6H)	7504.6
10106.2	47900000	6.47	3.71	undefined
7783.6	47900000	1.63	0.93	undefined
6162.6	47900000	1.46	0.83	undefined
1287.5	47900000	1.06	0.61	undefined
Probe 2 treated with ExolII （Mass peak list sorted by intensity)
Mass (Da)	Intensity	%Relative	%Total	Presumed molecular	Theoretical Mass of the ssDNA
1287.5	553000	100	11.26	GAAA or a mass peak of ExoIII	1286.8
627.8	335000	60.59	6.82	TT or a mass peak of ExoIII	626.4
13646.1	201000	36.26	4.08	undefined
10107.2	197000	35.57	4.01	undefined
1979.4	192000	34.81	3.92	undefined
11321.3	172000	31.18	3.51	undefined
4639.6	159000	28.74	3.24	FAM-GGGTGGGCGGAAA (-2H)	4641.6
6655.3	155000	28.11	3.16	undefined
1291.6	145000	26.29	2.96	GGGC or GCGG or GGCG (-3H) or a mass peak of ExoIII	1294.8
957.7	102000	18.39	2.07	AAA	957.6
9126.5	102000	18.42	2.07	undefined
1883.6	94900	17.16	1.93	undefined
5777.3	85700	15.49	1.74	undefined
3174.3	79500	14.37	1.62	undefined
924.9	76500	13.84	1.56	ACT	924.6
9538.2	73000	13.19	1.49	undefined
19134.7	72100	13.04	1.47	undefined
9735	70700	12.79	1.44	undefined
6984.3	68700	12.42	1.4	undefined
995.6	59700	10.79	1.22	undefined
10435.2	57100	10.32	1.16	undefined
11552.9	55000	9.94	1.12	undefined
3923	53600	9.68	1.09	undefined
6533.5	50000	9.04	1.02	undefined
2044.7	49800	9.01	1.01	undefined
7208.4	47300	8.56	0.96	undefined
1955.8	45200	8.18	0.92	undefined
12553.9	45100	8.15	0.92	undefined
4562.8	44700	8.08	0.91	undefined
7175.6	43000	7.78	0.88	undefined
922.7	39200	7.08	0.8	ACT (-2H)	924.6
4172.3	39200	7.09	0.8	GGTGGGCGGAAAA (+3H)	4168.6
11088.3	39100	7.07	0.8	undefined
16955.6	37800	6.83	0.77	undefined
3899	37500	6.79	0.76	undefined
4603.9	36100	6.53	0.74	undefined
3863.1	35900	6.49	0.73	undefined
19552.3	35200	6.36	0.72	undefined
6697.4	34800	6.29	0.71	undefined
11933.6	34500	6.23	0.7	undefined
16400.1	34400	6.22	0.7	undefined
3835	34000	6.15	0.69	GTGGGCGGAAAA (-4H)	3839.4
14153	33800	6.12	0.69	undefined
1272.3	33100	5.98	0.67	AAAA (+H)	1270.8
17329.2	33000	5.98	0.67	undefined
5855	32400	5.86	0.66	undefined
13918.1	32300	5.84	0.66	undefined
7147.3	31500	5.7	0.64	undefined
8179.5	30100	5.44	0.61	undefined
3080.4	29900	5.41	0.61	undefined
10188.8	29600	5.36	0.6	undefined
12977.1	28200	5.1	0.57	undefined
6968.1	24900	4.51	0.51	undefined
3139	24800	4.48	0.5	GCGGAAACTA (-2H)	3141
12129.9	24800	4.48	0.5	undefined
7789.9	24700	4.47	0.5	undefined
9385.7	24700	4.47	0.5	undefined
5326.1	24200	4.37	0.49	TGGGCGGAAAACTATTT (-3H)	5329.4
9766.6	24000	4.34	0.49	undefined
920.7	23600	4.26	0.48	undefined
7832.2	22600	4.09	0.46	undefined
7676.2	22400	4.05	0.46	undefined
2503.6	22200	4.01	0.45	CGGAAAAC (-4H)	2507.6
13982.3	21400	3.86	0.43	undefined
5463.4	21300	3.84	0.43	undefined
2403.7	21200	3.83	0.43	undefined
4815.5	20500	3.7	0.42	undefined
14112.8	19600	3.55	0.4	undefined
18620.9	19200	3.47	0.39	undefined
1256.3	18700	3.37	0.38	undefined
10006.3	18500	3.34	0.38	undefined
17915.6	17700	3.2	0.36	undefined
2586.8	17600	3.19	0.36	GGGTGGGC	2586.6
5655.6	16900	3.05	0.34	GTGGGCGGAAAACTATTT (-3H)	5658.6
2957.9	16600	3.01	0.34	undefined
3218.5	14900	2.7	0.3	GTGGGCGGAA (+6H)	3213
19438.4	14700	2.67	0.3	undefined
17034.9	13700	2.49	0.28	undefined
5794.5	12000	2.17	0.24	undefined
5757.7	11800	2.13	0.24	undefined
4264.4	11300	2.04	0.23	undefined
12772	11000	1.99	0.22	undefined
2825.5	10600	1.92	0.22	undefined
4946.7	10100	1.83	0.21	undefined
2888.2	9890	1.79	0.2	TGGGCGGAA (-2H)	2883.8
5053.8	9790	1.77	0.2	GTGGGCGGAAAACTAT (+4H)	5050.2
5997.8	9060	1.64	0.18	undefined
6369	8880	1.61	0.18	undefined
4052.2	8380	1.52	0.17	undefined
6161.7	8020	1.45	0.16	FAM-GGGTGGGCGGAAAACTAT (-4H)	6165.6
2828.8	7390	1.34	0.15	undefined
3298.1	5870	1.06	0.12	undefined
7939.5	5630	1.02	0.11	undefined
Probe 2 without ExolII
Mass (Da)	Intensity	%Relative	%Total	Presumed molecular	Theoretical Mass of the ssDNA
7059.7	33400000	100	66.55	FAM-GGGTGGGCGGAAAACTATTTC (-3H)	7063.2
7082.3	7840000	23.46	15.61	FAM-GGGTGGGCGGAAAACTATTTC (+Na-4H)	7063.2
7104.6	2950000	8.84	5.88	FAM-GGGTGGGCGGAAAACTATTTC (+2Na-5H)	7063.2
10106.5	2270000	6.8	4.52	undefined
7341.3	1200000	3.58	2.38	undefined
13461.6	1070000	3.21	2.14	undefined
11549	624000	1.87	1.24	undefined
3376.6	457000	1.37	0.91	FAM-GGGTGGGCG (+4H)	3372.8
7481.5	382000	1.14	0.76	undefined
Probe 3 treated with ExolII （Mass peak list sorted by intensity)
Mass (Da)	Intensity	%Relative	%Total	Presumed molecular	Theoretical Mass of the ssDNA
2936.9	8360000	100	51.7	FAM-AGTCCGTT (-H)	2937.6
3240.9	2770000	33.1	17.11	FAM-AGTCCGTTT (-H)	3241.8
2632.7	2340000	27.99	14.47	FAM-AGTCCGT (-H)	2633.4
2328.7	811000	9.69	5.01	FAM-AGTCCG	2329.2
643.8	459000	5.48	2.83	undefined
5922.8	298000	3.56	1.84	undefined
627.8	211000	2.53	1.31	TT or a mass peak of ExoIII	626.4
6601.4	194000	2.31	1.2	undefined
7333	152000	1.81	0.94	undefined
3262.9	144000	1.72	0.89	FAM-AGTCCGTTT (+Na-2H)	3241.8
9787.5	142000	1.7	0.88	undefined
11516	108000	1.29	0.67	undefined
18432.5	96800	1.16	0.6	undefined
2958.2	90000	1.08	0.56	FAM-AGTCCGTT (+Na-3H)	2937.6
Probe 3 without ExolII
Mass (Da)	Intensity	%Relative	%Total	Presumed molecular	Theoretical Mass of the ssDNA
6655.2	33000000	100	61.88	FAM-AGTCCGTTTGTTCTTGTGGC (-3H)	6658
6677.5	10600000	32.18	19.91	FAM-AGTCCGTTTGTTCTTGTGGC (+Na-4H)	6658
6699.9	6000000	18.15	11.23	FAM-AGTCCGTTTGTTCTTGTGGC (+2Na-5H)	6658
6721.6	1850000	5.59	3.46	FAM-AGTCCGTTTGTTCTTGTGGC (+3Na-6H)	6658
6936.6	1290000	3.91	2.42	undefined
643.8	589000	1.78	1.1	undefined
ExolII without ssDNA
Mass (Da)	Intensity	%Relative	%Total
1287.6	544000	100	15.21
627.8	345000	63.38	9.64
2639.4	191000	35.09	5.34
1291.6	147000	27.04	4.11
19174.8	136000	25.08	3.81
941.7	111000	20.42	3.1
6480.8	92500	17.01	2.59
9539.7	84200	15.49	2.35
11320.4	82400	15.15	2.3
6496.1	82300	15.14	2.3
909.9	66500	12.22	1.86
7853.9	66400	12.21	1.86
7953.9	62500	11.48	1.75
973.6	62400	11.48	1.75
2607.4	61300	11.28	1.71
5662.2	54800	10.07	1.53
5746.2	54500	10.02	1.52
1931.6	48400	8.9	1.35
3203.7	46100	8.47	1.29
979.7	42800	7.88	1.2
4050.2	42600	7.83	1.19
11491.4	40300	7.4	1.13
13884.3	37000	6.81	1.04
4619.7	35800	6.58	1
2408.3	34500	6.34	0.96
1019.6	33400	6.13	0.93
2988.7	32300	5.93	0.9
3139.1	32300	5.93	0.9
1271.7	32300	5.93	0.9
1257.7	31900	5.87	0.89
13712.4	31800	5.85	0.89
9214.1	31200	5.74	0.87
9980.2	30400	5.58	0.85
16666.5	29300	5.39	0.82
2511	29300	5.38	0.82
17936.4	27200	5	0.76
3223.6	27100	4.99	0.76
7774.4	27000	4.97	0.76
3878.6	26100	4.79	0.73
2544.4	24700	4.54	0.69
5758.8	24500	4.5	0.68
1306.7	22300	4.1	0.62
5776.1	21300	3.91	0.59
7543.4	21100	3.89	0.59
15519.1	19300	3.54	0.54
5706.8	19100	3.51	0.53
5870.8	18600	3.43	0.52
7811.8	18200	3.35	0.51
2651.7	18000	3.31	0.5
3898.9	17600	3.23	0.49
12462.7	16400	3.01	0.46
919.8	16100	2.95	0.45
10174.4	15900	2.93	0.45
5856.5	15200	2.79	0.42
7213.9	15100	2.77	0.42
4814.7	14900	2.73	0.42
2583.2	14400	2.65	0.4
8665.9	14000	2.58	0.39
9018.6	13400	2.46	0.37
3297.8	12400	2.29	0.35
4218.8	12200	2.24	0.34
4908	12000	2.21	0.34
5087.9	11900	2.19	0.33
18521.5	10800	1.99	0.3
1255.5	10400	1.91	0.29
12038.5	10000	1.84	0.28
1540.1	9610	1.77	0.27
13199.6	9380	1.72	0.26
4872.1	9220	1.7	0.26
6712.9	9120	1.68	0.26
7166.4	8870	1.63	0.25
3248.5	8800	1.62	0.25
4708.1	8570	1.57	0.24
14607.4	8470	1.56	0.24
3835.6	8460	1.56	0.24
14411.8	8260	1.52	0.23
7138.1	7750	1.42	0.22
9446.4	6750	1.24	0.19
5814	6370	1.17	0.18
1140.4	6350	1.17	0.18
5801.6	5870	1.08	0.16
16420	5770	1.06	0.16
8837.5	5750	1.06	0.16
16117.5	5510	1.01	0.15
7294.4	5480	1.01	0.15
